# Supplementary material for: A tyrosine-modified hypocrellin B with affinity for and photodamaging ability towards calf thymus DNAElectronic supplementary information (ESI) available: synthesis and ESR spectra of TYHB. See http://www.rsc.org/suppdata/cc/b3/b309024h/
Source: Royal Society of Chemistry journal article supplement (doi:10.1039/b309024h), 2003-01-01
Supplement: b309024h.pdf [file b309024h.pdf]

ESI

**Scheme 1s.** Synthesis of TYHB

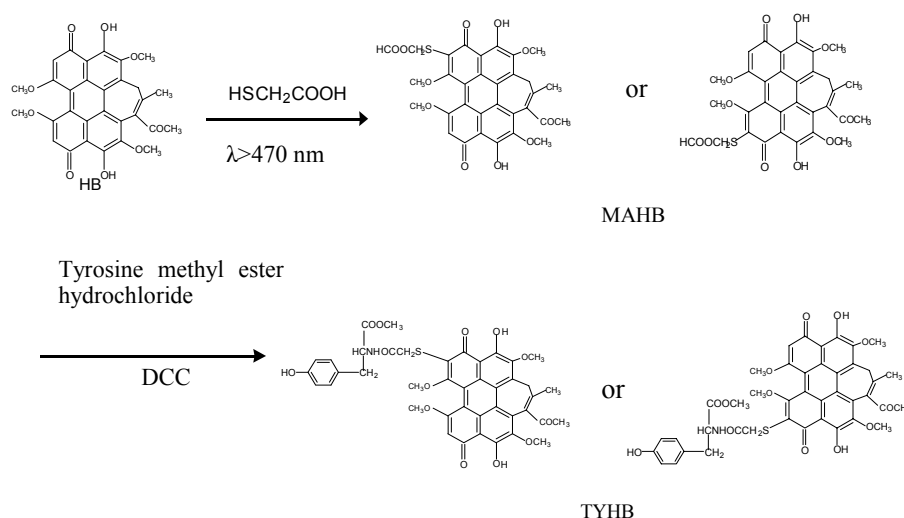

MAHB 62mg (0.1mmol) was added to a stirring solution of tyrosine methyl ester hydrochloride 23mg (0.1mmol),  $\text{Na}_2\text{CO}_3$  10.6mg (0.1mmol) and dicyclohexylcarbodiimide (DCC) 20.6mg (0.1mmol) in 20mL of  $\text{CH}_2\text{Cl}_2$  under a nitrogen atmosphere at room temperature. After 10h reaction, the mixture was filtered, the filtrate was washed with 10% HCl, saturated  $\text{NaHCO}_3$  aqueous solution and pure  $\text{H}_2\text{O}$  successively. The organic layer was concentrated under reduced pressure, purified by TLC with mixed solvent of  $\text{CH}_3\text{Cl}_3:\text{CH}_3\text{OH}$  (200:5 in volume ratio) as eluant to give TYHB (30% yield).  $^1\text{H}$  NMR (400MHz,  $\text{CDCl}_3$ )  $\delta$  15.93(s,2H), 15.32(s,1H), 6.52(d,  $J=8.24\text{Hz}$ , 2H), 6.45(d,  $J=8.24\text{Hz}$ , 2H), 6.04 and ? (two singlet from H on 5- and 8-carbon respectively, 1H), 5.61(d,  $J=8.38\text{Hz}$ , 1H), 5.00(t, 1H), 3.75–4.23(m, 14H), 2.86–2.94(m, 2H), 2.38(s, 3H), 1.93(s, 3H).

Irradiation of argon-gassed DMSO solution of TYHB (50 $\mu\text{M}$ ) generated an ESR signal (Fig. 1, spectrum a), which has the same position and line shape as that of  $\text{HB}^{-1}$ , can be quenched efficiently by  $\text{O}_2$ , and its formation need both irradiation and TYHB, therefore can be ascribed to the semiquinone anion radical of TYHB ( $\text{TYHB}^{\cdot-}$ ). MAHB.

When irradiation was carried out in an oxygen-saturated DMSO solution of TYHB with 2,2,6,6-tetraethyl-4-piperidone (TEMP) as spin-trapping agent, a characteristic ESR signal of TEMPO (adduct of TEMP with  $^1\text{O}_2$ ) was detected (three lines with identical intensity and hyperfine coupling constant of 16.0G, Fig. 1, spectrum b)<sup>2</sup>. The presence of  $\text{O}_2$ , TYHB and light are all essential for the ESR signal observation. The signal can be quenched by  $^1\text{O}_2$  scavengers such as 1,4-diazabicyclo[2,2,2]octane efficiently.

When the oxygen was bubbled through the TYHB solution in DMSO in the presence of 5,5-dimethyl-1-pyrroline N-oxide (DMPO) and the TYHB solution was irradiated, the ESR signal of DMPO-superoxide anion radical adduct  $\text{DMPO-O}_2^{\cdot-}$  was observed<sup>3</sup>. This signal can be characterized by three hyperfine coupling constants:  $\alpha^{\text{N}} = 13.0\text{G}$ ,  $\alpha_{\beta}^{\text{H}} = 10.1\text{G}$ , and  $\alpha_{\gamma}^{\text{H}} = 1.5\text{G}$  (Fig. 1, spectrum c). An efficient quenching by superoxide dismutase, a scavenger of  $\text{O}_2^{\cdot-}$ , supports the assignment of this signal.

If water is present in air-saturated DMSO solution of TYHB and DMPO, the ESR signal of DMPO-hydroxyl radical adduct ( $\text{DMPO-OH}^{\cdot}$ ) can be readily resolved<sup>4</sup>, which exhibits a four-line signal with intensity ratio of 1:2:2:1 and has a hyperfine constant of 14.9 G (Fig. 1, spectrum d). In aqueous solution  $\text{O}_2^{\cdot-}$  undergoes rapid dismutation to form  $\text{H}_2\text{O}_2$  which transforms to  $\text{OH}^{\cdot}$  further.<sup>5</sup>

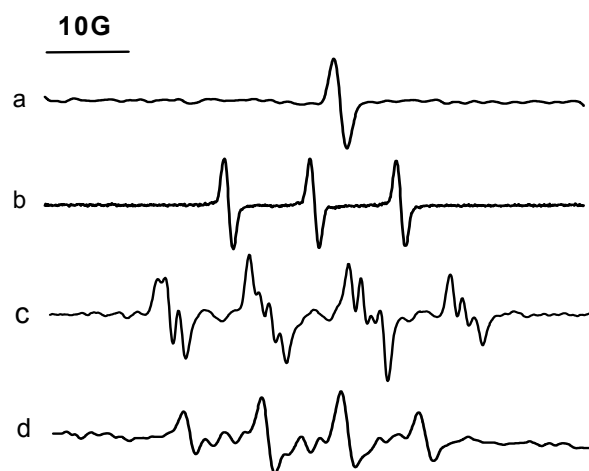

**Fig. 1s** Spectrum a: photoinduced ESR signal in nitrogen-saturated DMSO solution of TYHB (50 $\mu$ M), illumination was with 532nm pulsed laser for 2min. Spectrum b: similar to spectrum a, but in oxygen saturated solution and in the presence of TEMP (20mM), and irradiated for 40s. Spectrum c: similar to spectrum a, but in air-saturated solution and in the presence of DMPO (450mM), and irradiated for 1min. Spectrum d: similar to spectrum c but in the presence of a small amount of water. Spectral parameter settings: microwave bridge: X-band; sweep width: 100G; modulation amplitude: 1.0 G; receiver gain:  $1 \times 10^5$ ; microwave power: 5mW.
